# Supplementary material for: Spatial Bistability Generates hunchback Expression Sharpness in the Drosophila Embryo
Source: PLOS journal article supplement (doi:10.1371/journal.pcbi.1000184), 2008-09-25
Supplement: S2 (10.1371/journal.pcbi.1000184.s002) [file journal.pcbi.1000184.s002]

**Table S2. Kinetic constants to simulate a weak and strong response to half-dosage of  $bcd^{K57R}$**

The simulations for weak and strong response to half-dosage of  $bcd^{K57R}$  are the heavy blue lines in Fig. 1G and 1H, respectively. All other parameters as in Table S1. This value of  $k_{0,B}$  was also used to simulate WT Bcd half-dosage ( $bcd^{E1/+}$ ; heavy blue line in Fig. 1F).

| Strong K57R              | Weak K57R                |
|--------------------------|--------------------------|
| $k_{0,B} = 1.2908+03$    | $k_{0,B} = 1.2908e+03$   |
| $k_{b1,b2} = 4.3677e-04$ | $k_{b1,b2} = 5.8440e-04$ |
| $k_{b2,b3} = 7.8953e-04$ | $k_{b2,b3} = 1.4135e-03$ |
| $k_{b3,b4} = 1.4272e-03$ | $k_{b3,b4} = 3.4189e-03$ |
| $k_{b4,b5} = 2.580e-03$  | $k_{b4,b5} = 8.2693e-03$ |
| $k_{b5,b6} = 4.6637e-03$ | $k_{b5,b6} = 2.0001e-02$ |
